# 1 Abstract

2 Although initial studies suggested that Denisovan ancestry was found only in modern  
3 human populations from island Southeast Asia and Oceania, more recent studies have  
4 suggested that Denisovan ancestry may be more widespread. However, the  
5 geographic extent of Denisovan ancestry has not been determined, and moreover the  
6 relationship between the Denisovan ancestry in Oceania and that elsewhere has not  
7 been studied. Here we analyze genome-wide SNP data from 2493 individuals from  
8 221 worldwide populations, and show that there is a widespread signal of a very low  
9 level of Denisovan ancestry across Eastern Eurasian and Native American (EE/NA)  
10 populations. We also verify a higher level of Denisovan ancestry in Oceania than that  
11 in EE/NA; the Denisovan ancestry in Oceania is correlated with the amount of New  
12 Guinea ancestry, but not the amount of Australian ancestry, indicating that recent  
13 gene flow from New Guinea likely accounts for signals of Denisovan ancestry across  
14 Oceania. However, Denisovan ancestry in EE/NA populations is equally correlated  
15 with their New Guinea or their Australian ancestry, suggesting a common source for  
16 the Denisovan ancestry in EE/NA and Oceanian populations. Our results suggest that  
17 Denisovan ancestry in EE/NA is derived either from common ancestry with, or gene  
18 flow from, the common ancestor of New Guineans and Australians, indicating a more  
19 complex history involving East Eurasians and Oceanians than previously suspected.

20  
21 **Keywords:** Denisovans; Neanderthals; Archaic admixture; Modern humans.

# 1    **Significance Statement**

2    Archaic hominins genetically interacted with the ancestors of present-day humans, but  
3    the scope and magnitude of this interaction has not been fully documented. Our study  
4    reveals that ancestry from Denisovans, (an archaic human group identified in the Altai  
5    Mountains of southern Siberia), is prevalent in populations across eastern Eurasia and  
6    the Americas, rather than only in island populations of Southeast Asia and Oceania as  
7    previously reported. We show that the Denisovan ancestry in Eastern Eurasians and  
8    Native Americans is probably derived from either common ancestry with, or ancient  
9    gene flow from, the common ancestor of present-day New Guineans and Australians,  
10    thereby demonstrating a more complex relationship of these human populations than  
11    previously suspected.

# 12    **Introduction**

13    Following the initial description and analysis of a genome sequence from an archaic  
14    human fossil from Denisova Cave in southern Siberia (1), Denisovan admixture was  
15    subsequently found to be limited to populations from eastern Indonesia, the  
16    Philippines, and Near and Remote Oceania (1–3). This finding was quite surprising,  
17    given that the Denisova Cave site is located some 7000 km away from the populations  
18    that currently exhibit Denisovan ancestry, and was interpreted as suggesting that  
19    Denisovan admixture occurred somewhere in the vicinity of island Southeast Asia (2).  
20    However, further studies have indicated that Denisovan ancestry may be more  
21    widespread than initially thought (4). In particular, a recent study inferred low levels  
22    of Denisovan ancestry of about 0.2% in three genome sequences, from a Dai and a

1 Han Chinese from East Asia and a Karitiana from South America (5). Moreover, it  
2 appears that a genetic adaptation to high altitude in the Tibetan Plateau occurred via  
3 introgression from a Denisovan-related population into ancestral Tibetans (6). Overall,  
4 these results suggest that Denisovan ancestry is not limited to populations from island  
5 Southeast Asia and Oceania, as originally thought. However, only a few populations  
6 have been systematically evaluated for signals of Denisovan ancestry; it is not clear if  
7 a very low level of Denisovan ancestry is geographically widespread, or rather limited  
8 to only a few populations outside of island Southeast Asia and Oceania. An additional  
9 question of interest is whether the Denisovan ancestry in these other populations  
10 reflects the same admixture event that contributed Denisovan ancestry to island  
11 Southeast Asian and Oceanian populations, or a different admixture event.

12 To address these and other questions related to Denisovan ancestry in human  
13 populations, we here present a systematic investigation of Denisovan introgression in  
14 Eastern Eurasia (defined here to include South Asia, East Asia, Southeast Asia,  
15 Central Asia, Siberia, and Oceania) and in Native American populations, hereafter  
16 abbreviated as EE/NA. Genome-wide data were collected from worldwide  
17 populations and analyzed along with high coverage genomes sequences from a  
18 Denisovan (3) and a Neanderthal (5). The analyses we report provide more details  
19 concerning the admixture history of modern humans with Denisovans.

## 20 **Results**

### 21 **Relationship of present-day humans and archaic hominins**

22 We assembled a dataset which, after quality filtering, consisted of 2493 individuals

1 from 221 populaions, all genotyped on the Affymetrix Human Origins Array (8).  
2 After merging the human data with the chimpanzee, Denisovan, and Neanderthal  
3 genome sequences, there were nearly 600,000 SNPs for analysis. To investigate the  
4 relationship of the diverse present-day human populations relative to archaic hominins,  
5 we carried out Principal Component Analysis (PCA) (9) on the chimpanzee,  
6 Neanderthal and Denisovan data, and projected the modern human samples onto the  
7 plane defined by the top two eigenvectors. The human samples all appear at the center  
8 of the plot ([Fig. S1A](#)); magnification of the central portion of the plot shows that  
9 humans separate into three clusters relative to archaic hominins and chimpanzees:  
10 African, Oceanian and other Non-African ([Fig. S1B](#)). To more clearly visualize the  
11 patterns, we plotted the mean of eigenvectors 1 and 2 for each of the 221 modern  
12 human populations ([Fig. 1A](#)). The first eigenvector separates the Africans from  
13 non-Africans and shows that the non-Africans are clearly closer to archaic hominins  
14 than are the Africans. The second eigenvector suggests closer genetic affinity between  
15 Oceanians and Denisovan than between other populations and Denisovan. There is a  
16 clear cline of Denisovan-related ancestry in Oceanian with Australians and New  
17 Guineans having the most Denisovan ancestry ([Fig. S2](#)). The Mamanwa, from the  
18 Philippines, are also involved in this cline, which is consistent with previous findings  
19 that the Mamanwa are related to Australians and New Guineans, and Denisovan  
20 admixture occurred in a common ancestral population of the Mamanwa, Australians,  
21 and New Guineans (2).

## 22 **Additional Archaic Ancestry in EE/NA Populations**

1 PCA is a descriptive analysis that is useful for indicating potential admixture events,  
2 but cannot be used to prove that admixture occurred. We therefore applied formal  
3 tests to document potential admixture between archaic hominins and modern humans.  
4 Since EE/NA populations have on average inherited more archaic ancestry than West  
5 Eurasian populations (7), we computed  $f_4$  statistics (8, 10) of the form  
6  $f_4(\text{Yoruba}, \text{Archaic}; \text{French}, X)$ , in which  $X$  is an EE/NA population. A significantly  
7 positive statistic ( $Z\text{-score} > 2$ ) is evidence that EE/NA possesses more Archaic (either  
8 Neanderthal or Denisovan) alleles than does the French population. Significantly  
9 positive statistics ( $Z\text{-score} > 6$ ) are obtained for all Oceanian populations, which are  
10 much higher than those for other EE/NA populations, indicating more archaic  
11 ancestry in Oceanians (Fig. 1B and Table S3). Moreover, there are more Denisovan  
12 than Neanderthal alleles shared with the Oceanian and Mamanwa populations (Fig.  
13 1B), although Neanderthal ancestry is also elevated, probably because signals of  
14 Denisovan and Neanderthal ancestry are difficult to distinguish in this analysis. In  
15 addition to the Oceanian populations, many additional EE/NA populations exhibit  
16 significant Z-scores ( $> 2$ ), indicating they have more archaic alleles than the French  
17 population has. However, unlike the Oceanian populations, the inferred amounts of  
18 Denisovan and Neanderthal alleles are approximately the same in these EE/NA  
19 populations (Fig. 1B). It is thus not clear from this analysis if the additional archaic  
20 ancestry in these EE/NA populations reflects Neanderthal ancestry, Denisovan  
21 ancestry, or both. In order to increase the power of these tests, we combined the data  
22 from the East Asian, Siberian, and native American populations, and obtained

1 significantly higher signals of archaic ancestry ( $Z$ -score = 3.12 for Neanderthal and  
2 3.64 for Denisovan, compared to the average single population  $Z$ -scores of  $2.79 \pm$   
3  $0.07$  for Neanderthal and  $3.17 \pm 0.08$  for Denisovan). To ensure that our results are  
4 not influenced by the choice of African (Yoruba) and European (French) reference  
5 populations used in this  $f_4$  analysis, we repeated the analysis with different reference  
6 populations and obtained similar results (Fig. S3).

7 We further computed the statistic  $f_4(\text{Yoruba}, X; \text{Neanderthal}, \text{Denisovan})$   
8 which compares the genetic affinity of present-day non-Africans with different  
9 archaic hominins (Fig. 2). Positive values of this  $f_4$  statistic indicate excess sharing of  
10 Denisovan alleles (relative to Neanderthals); negative values indicate excess sharing  
11 of Neanderthal alleles, and values near zero indicate equivalent amounts of alleles  
12 shared with Denisovans and Neanderthals. We obtain larger values in Oceanians than  
13 in other non-Africans, which is consistent with the observations based on the PCA  
14 and on formal tests of admixture. The largest values are observed in New Guineans,  
15 Australians, and some populations from Remote Oceania (Table S4), consistent with  
16 previous results (2). Negative values are observed in most non-African populations,  
17 indicating sharing of more Neanderthal than Denisovan alleles in these populations.  
18 Moreover, larger values are observed in East Asians than in West Eurasians,  
19 suggesting most East Asians share more alleles with Neanderthal than West Eurasians  
20 do. Native Americans are generally more similar to West Eurasians in the patterns of  
21 allele sharing, suggesting that either Native Americans have the same amount of allele  
22 sharing with Neanderthal as West Eurasians do, or Native Americans shared more

1 Neanderthal alleles than West Eurasians and additionally share a small amount of  
2 Denisovan alleles. This procedure was repeated using different African populations in  
3 the  $f_4$  statistics and similar results were obtained (Fig. S4).

## 4 **Denisovan ancestry in Oceanians**

5 Denisovan ancestry in Oceanians has been documented previously (1–3). To verify  
6 and extend these previous results, we analyzed a larger set of Oceanian populations  
7 that were genotyped on a different platform, and also utilized the high-coverage  
8 archaic genomes (3, 5).

9       Following previous methods (8, 11), we used a ratio of  $f_4$  statistics to estimate  
10 the admixture proportion of Denisovans ( $p_D(X)$ ) in Oceanians (see SI). Since  
11 Oceanians retain both Denisovan and Neanderthal ancestry, we used Han Chinese to  
12 control for the Neanderthal ancestry in Oceanians, under the assumption that Han and  
13 Oceanians share a similar number of Neanderthal alleles. To evaluate the validity of  
14 this assumption, we examined the  $f_4(\text{Yoruba}, \text{Han}; \text{Neanderthal}, X)$  and  
15  $f_4(\text{Yoruba}, \text{Han}; \text{Denisovan}, X)$  statistics for each Oceanian population  $X$ . If Han  
16 and the  $X$  possess similar amounts of Neanderthal alleles, then any changes in the two  
17 statistics will be driven by the varying amount of their Denisovan alleles. The two  
18 statistics will thus have a linear relationship with an intercept close to (0,0). However,  
19 if the amount of Neanderthal alleles differs in the two populations, then the linear  
20 model will not cross at the point of origin. Empirically, these two sets of  $f_4$  statistics  
21 are indeed linearly correlated ( $R^2 = 0.99$ ; Fig. S5) and the intercept for the linear  
22 model fitting the data is near (0,0), indicating that Han and Oceanians are similarly



1 close to Neanderthal. (see [SI](#)).

2 The highest  $p_D(X)$  value is observed in Australians and New Guineans  
 3 ( $0.034 \pm 0.002$  and  $0.034 \pm 0.005$  respectively) ([Fig. 3A](#)), which is consistent with  
 4 previous results (2) and suggests Denisovan introgression into the common ancestor  
 5 of Australians and New Guineans. We also observed high amounts ( $>3\%$ ) of  
 6 Denisovan ancestry in Bougainville, as observed previously (2), and in Santa Cruz, a  
 7 population from Remote Oceania which was not analyzed previously. This latter  
 8 result is in keeping with previous observations of extraordinarily high frequencies and  
 9 diversity of mtDNA and Y-chromosome haplogroups of New Guinean origin in Santa  
 10 Cruz (12, 13), which suggest high amounts of New Guinean ancestry (and thereby  
 11 Denisovan ancestry) in Santa Cruz. All other Oceanian populations have Denisovan  
 12 ancestry ranging from 0.9-3%.

13 It was shown previously that Denisovan ancestry in Oceanian groups (other than  
 14 Australia and New Guinea), as well as in eastern Indonesia, was likely to be an  
 15 indirect consequence of admixture with New Guineans, as the Denisovan ancestry in  
 16 these other Oceanian and eastern Indonesian groups is proportional to their New  
 17 Guinea ancestry (2). We observe a similar correlation for the 17 Oceanian populations  
 18 (excluding Australia and New Guinea) in the present study ([Fig. 3B](#)). However, given  
 19 that Australia and New Guinea share common ancestry, it is possible that the  
 20 Denisovan ancestry in these Oceanian populations was contributed by admixture from  
 21 Australia or from the ancestral Australia-New Guinea population, rather than directly  
 22 from New Guinea; these possibilities were not examined in previous studies. We

1 evaluated these alternative possibilities by the statistic  
2  $f_4(\text{Yoruba}, X; \text{NewGuinea}, \text{Australia})$ , and found that Oceanians share significantly  
3 more alleles with New Guineans than with Australians (Table S5). These results  
4 suggest that Denisovan ancestry in Oceanians is likely to derive from recent  
5 admixture with New Guineans, rather than admixture with Australians or the common  
6 ancestor of Australians and New Guineans.

## 7 **Denisovan introgression in East/South Asian, Siberian and Native** 8 **American populations**

9 To detect Denisovan introgression in EE/NA populations, we computed the ratio of  
10 two  $f_4$  statistics ( $R_D(X)$ ):  $f_4(\text{Yoruba}, \text{Denisovan}; \text{French}, X)$  and  
11  $f_4(\text{Yoruba}, \text{Neanderthal}; \text{French}, X)$ , for each EE/NA population. Populations with  
12  $R_D(X) > 1$  are likely to have Denisovan ancestry (see SI). Before we applied the  
13 approach to empirical data, we evaluated the performance of this statistic via  
14 simulations (see SI and Fig. S6). For simulated populations with Denisovan ancestry,  
15 we always observed large ratios ( $R_D(X) > 1$ ), while small ratios ( $R_D(X) < 1$ ) were  
16 obtained for simulated populations without Denisovan ancestry (Fig. S7). We then  
17 computed  $R_D(X)$  for all EE/NA populations exhibiting significant admixture signals  
18 with Denisovans and/or Neanderthals in formal admixture tests (Fig. 1B and Table  
19 S3). As expected, we observed large ratios ( $R_D(X) > 1$ ) in all Oceanian populations  
20 (Fig. 4). Variable results were obtained for the other EE/NA populations, with  $R_D(X) >$   
21 1 observed in several populations, including most Native American populations (Fig.  
22 4). Overall, this analysis indicates that there are EE/NA populations outside Oceania

1 with a clear signal of Denisovan ancestry. Similar results are obtained with the use of  
2 different reference populations (Table S6).

3 Is this presumptive Denisovan ancestry in EE/NA populations from the same  
4 admixture event that contributed Denisovan ancestry to Oceanian populations, or does  
5 it rather represent a separate admixture event (or events) between modern humans and  
6 Denisovans? We postulated that if it reflects the same event that contributed  
7 Denisovan ancestry to Oceanians, then the amount of Denisovan ancestry in EE/NA  
8 populations should be correlated with the amount of New Guinean ancestry. Because  
9 the estimated amount of Denisovan ancestry is quite small in EE/NA populations, and  
10 difficult to distinguish from Neanderthal ancestry, we instead compared the overall  
11 amount of archaic admixture in EE/NA populations (as a fraction of that in New  
12 Guinean), which is calculated by the ratio of  $f_4(\text{Yoruba}, \text{Denisovan}; \text{French}, X)$   
13 and  $f_4(\text{Yoruba}, \text{Denisovan}; \text{French}, \text{NewGuinean})$ , to the statistic  
14  $f_4(\text{Yoruba}, \text{NewGuinean}; \text{French}, X)$ . These two values are significantly correlated  
15 (Fig. 5A, Pearson  $R^2 = 0.23$ ,  $p = 2.5 \times 10^{-3}$ ). However, this analysis could be  
16 confounded by admixture between East Asians and New Guineans, which has  
17 occurred as a consequence of the Austronesian expansion (14, 15) and perhaps other  
18 population movements. We therefore removed the East Asian populations and  
19 repeated the analysis just for Siberians and Native Americans, and obtained an even  
20 higher correlation (Fig. 5B, Pearson  $R^2 = 0.54$ ,  $p = 3.8 \times 10^{-6}$ ). Thus, archaic  
21 ancestry in EE/NA populations is significantly correlated with their New Guinea  
22 ancestry, suggesting that the Denisovan ancestry in EE/NA and Oceanian populations

1 reflects the same admixture event.

2        However, there are (at least) two potential alternate scenarios that could explain  
3 these results. First, Denisovan admixture could have occurred in a population that was  
4 ancestral to both EE/NA and Oceanian populations; second, admixture could have  
5 occurred in a population that was ancestral specifically to Mamanwa, Australians, and  
6 New Guineans (as suggested previously (2)), followed by a back-migration from New  
7 Guinea to mainland East Asia. This putative back-migration would then have spread  
8 both New Guinea and Denisovan ancestry throughout East Asia and Siberia, and  
9 ultimately to the Americas. To distinguish between these two scenarios, we repeated  
10 the previous analysis but substituted Australians for New Guineans, comparing the  
11 archaic admixture in EE/NA populations (as a fraction of that in Australians) to the  
12 statistic  $f_4(\text{Yoruba}, \text{Australian}; \text{French}, X)$ . The results are virtually identical to  
13 those obtained with New Guineans as the comparison (Fig. 5C, 5D). Moreover,  
14 whereas Oceanian populations are more closely related to New Guineans than to  
15 Australians, EE/NA populations are equally related to Australians and New Guineans  
16 (Table S5). These results indicate that the archaic ancestry in EE/NA populations is  
17 shared with the common ancestor of Australians and New Guineans, and hence  
18 reflects the same admixture event.

## 19 **Discussion**

20 Our analyses demonstrate that, in addition to being prevalent in Oceanian populations,  
21 Denisovan introgression is present in East Eurasian and Native American populations,  
22 even though the amount of Denisovan alleles in these latter populations is relatively

1 small. These results thus confirm and extend previous studies suggesting Denisovan  
2 ancestry outside of Oceania (4-6). In particular, as found previously (2), Denisovan  
3 ancestry in Oceania is highly correlated with New Guinea ancestry. This suggests that  
4 these populations have either shared ancestry or contact with New Guinea that is more  
5 recent than the Denisovan admixture event. However, previous studies did not  
6 exclude the possibility that more ancient shared ancestry with New Guinean (after the  
7 Denisovan admixture event but before the divergence between New Guinean and  
8 Australian) explains the correlated signals of Denisovan and New Guinean ancestry in  
9 Oceania. Another potential explanation would be migrations from Australian rather  
10 than New Guinean, which could still produce a significant correlation between  
11 Denisovan and New Guinean ancestry as a consequence of the genetic relationship of  
12 Australians and New Guineans. To test these other possibilities, we compared  
13 amounts of Denisovan and Australian ancestry in Oceanian populations, and found  
14 that New Guinean ancestry does indeed provide a better explanation for the  
15 Denisovan ancestry in these Oceanian populations than does Australian ancestry  
16 ([Table S5](#)).

17 Our results also show a consistent signal of a low-level of Denisovan ancestry  
18 outside of Oceania, in populations of East Eurasia and the Americas. Although this  
19 signal does not reach significance in all populations ([Fig. 4](#)), given how widespread  
20 the signal is, it seems most reasonable to assume that all EE/NA populations probably  
21 do harbor some Denisovan ancestry. As with Oceanian populations, the Denisovan  
22 ancestry in EE/NA populations is correlated with their New Guinean ancestry.

1 However, unlike Oceanian populations, the Denisovan ancestry in EE/NA populations  
2 is equally correlated with their Australian ancestry, and moreover EE/NA populations  
3 are just as closely related to Australians as they are to New Guineans (Fig. 5).

4 There are (at least) two potential scenarios that could account for these results.  
5 First, there was introgression from a population related to Denisovans into a modern  
6 human population that was ancestral to all EE/NA and Oceanian populations. After  
7 the separation of the ancestral EE/NA and Oceanian populations, subsequent  
8 migration(s) then brought other modern human ancestry into the ancestors of EE/NA  
9 (but not Australian or New Guinean) populations, thereby “diluting” Denisovan  
10 ancestry in EE/NA populations. This scenario has two important consequences. First,  
11 it means that the introgression between Denisovans and modern humans did not  
12 necessarily occur in island Southeast Asia as postulated previously (2), but instead  
13 could have occurred closer to the vicinity of Denisova Cave, in southern Siberia.  
14 Second, identifying the source(s) of the other modern human ancestry in EE/NA  
15 populations would be of great interest for further understanding the genetic history of  
16 human populations.

17 The second scenario that could explain the different amounts of Denisovan  
18 ancestry in Oceanians vs. EE/NA populations would be that Denisovan introgression  
19 occurred specifically in a population ancestral to Australians, New Guineans, and the  
20 Mamanwa, as hypothesized previously (2). After the Denisovan admixture, but before  
21 the divergence of Australians and New Guineans, there would then have been a  
22 back-migration from Oceania to mainland East Asia, which would have contributed

1 both Denisovan and shared Australian/New Guinea ancestry to the ancestors of  
2 present day EE/NA populations. While we are not aware of any previous suggestions  
3 of such a back-migration from archaeological, anthropological, or genetic evidence,  
4 we also are not aware of any evidence that would disprove such a back-migration.

5 It thus seems that at present these two scenarios are equally plausible  
6 explanations for our results. In any event, the inescapable conclusion is that  
7 Denisovan ancestry is more widespread in modern human populations than thought  
8 previously to be the case, and moreover human genetic history must consequently  
9 also be more complicated than previously believed. Mapping the segments of  
10 Denisovan ancestry in modern human populations, as has been done for Neanderthal  
11 ancestry (5, 16, 17), should provide more insights into the history and consequences  
12 of the interactions between Denisovans and modern humans.

## 13 **Materials and Methods**

14 We genotyped 168 individuals from 20 populations of Oceania and Southeast Asia  
15 with the Affymetrix Human Origins Array (8). An additional 2890 samples from 236  
16 worldwide modern human populations, and high coverage sequences of two archaic  
17 hominins (Altai Neanderthal, 52× (5) and Denisovan, 31× (3)) were merged into  
18 the dataset. Principal component analysis was performed with EIGENSOFT (18)  
19 version 5.0.1. We performed PCA on chimpanzee and archaic hominin data, and then  
20 projected modern humans. Formal tests for archaic admixture in modern humans was  
21 performed by  $f_4$  statistics (8, 10). Admixture proportions were estimated by an

1  $f_4$ ratio (8, 11). More details of the materials and methods can be found in supporting  
2 information.

### 3 **Acknowledgements**

4 We thank David Reich for assistance with the production of the genotype data, and  
5 Kay Prüfer, Janet Kelso, and David Reich for helpful discussion and commenting on  
6 the manuscript. This research was supported by the Max Planck Society.

### 7 **References**

- 8 1. Reich D et al. (2010) Genetic history of an archaic hominin group from  
9 Denisova Cave in Siberia. *Nature* 468:1053–60.
- 10 2. Reich D et al. (2011) Denisova admixture and the first modern human  
11 dispersals into Southeast Asia and Oceania. *Am J Hum Genet* 89:516–28.
- 12 3. Meyer M et al. (2012) A high-coverage genome sequence from an archaic  
13 Denisovan individual. *Science* 338:222–6.
- 14 4. Skoglund P, Jakobsson M (2011) Archaic human ancestry in East Asia. *Proc*  
15 *Natl Acad Sci U S A* 108:18301–6.
- 16 5. Prüfer K et al. (2014) The complete genome sequence of a Neanderthal from  
17 the Altai Mountains. *Nature* 505:43–9.
- 18 6. Huerta-Sánchez E et al. (2014) Altitude adaptation in Tibetans caused by  
19 introgression of Denisovan-like DNA. *Nature* 512:194–197.
- 20 7. Wall JD et al. (2013) Higher levels of neanderthal ancestry in East Asians than  
21 in Europeans. *Genetics* 194:199–209.
- 22 8. Patterson N et al. (2012) Ancient admixture in human history. *Genetics*  
23 192:1065–93.
- 24 9. Price AL et al. (2006) Principal components analysis corrects for stratification  
25 in genome-wide association studies. *Nat Genet* 38:904–9.
- 26 10. Reich D, Thangaraj K, Patterson N, Price AL, Singh L (2009) Reconstructing  
27 Indian population history. *Nature* 461:489–494.



- 1 11. Moorjani P, Patterson N, Hirschhorn J (2011) The history of African gene flow  
2 into Southern Europeans, Levantines, and Jews. *PLoS Genet* 7, doi:  
3 10.1371/journal.pgen.1001373.
- 4 12. Delfin F et al. (2012) Bridging near and remote Oceania: mtDNA and NRY  
5 variation in the Solomon Islands. *Mol Biol Evol* 29:545–64.
- 6 13. Duggan AT et al. (2014) Maternal history of Oceania from complete mtDNA  
7 genomes: contrasting ancient diversity with recent homogenization due to the  
8 Austronesian expansion. *Am J Hum Genet* 94:721–33.
- 9 14. Wollstein A et al. (2010) Demographic history of Oceania inferred from  
10 genome-wide data. *Curr Biol* 20:1983–92.
- 11 15. Duggan AT, Stoneking M (2014) Recent developments in the genetic history of  
12 East Asia and Oceania. *Curr Opin Genet Dev* 29C:9–14.
- 13 16. Sankararaman S et al. (2014) The genomic landscape of Neanderthal ancestry  
14 in present-day humans. *Nature* 507:354–7.
- 15 17. Vernot B, Akey JM (2014) Resurrecting surviving Neandertal lineages from  
16 modern human genomes. *Science* 343:1017–21.
- 17 18. Patterson N, Price AL, Reich D (2006) Population structure and eigenanalysis.  
18 *PLoS Genet* 2:e190, doi:10.1371/journal.pgen.0020190.
- 19

# 1 **Figure Legends**

## 2 **Fig. 1. The relationships among modern human populations relative to archaic** 3 **humans.**

4 (A) PCA of 221 populations projected onto the top two eigenvectors defined by  
5 Neanderthal, Denisovan and chimpanzee. The mean values of eigenvectors 1 and 2  
6 are plotted for each population. (B) Formal admixture tests suggest a substantial  
7 number of EE/NA and Oceanian populations inherited significantly more archaic  
8 ancestry than West Eurasian populations. We used  $f_4$  statistics of the form  
9  $f_4(\text{Yoruba}, \text{Archaic}; \text{French}, X)$  to test admixture between archaic humans and  
10 modern human populations. A Z-score larger than 2 was set as the threshold for  
11 determining if admixture is significantly greater than zero.

## 12 **Fig. 2. Archaic introgression in modern humans is prevalent and varies across** 13 **different geographic regions.**

14 The sharing of Neanderthal and Denisovan alleles with each non-African population  
15 was measured by  $f_4$  statistics of the form  
16  $f_4(\text{Yoruba}, X; \text{Neanderthal}, \text{Denisovan})$ . An excess of allele sharing with  
17 Denisovan yields positive values while an excess with Neanderthal yields negative  
18 values. The heat plot values indicated on the map are valid only for regions covered  
19 by our samples.

## 20 **Fig. 3. Denisovan ancestry in Oceanians.**

1 (A) Estimated Denisovan ancestry in Oceanian populations. (B) Denisovan ancestry  
2 in Oceanians is highly correlated with their New Guinean ancestry.

3 **Fig. 4. Widespread Denisovan ancestry in EE/NA populations.**

4 Values of the  $R_D(X)$  ratio are plotted for all EE/NA populations which give  
5 significant signals of admixture with Neanderthal or Denisovan in formal tests; values  
6 greater than one (dashed line) are indicative of Denisovan ancestry.

7 **Fig. 5. Denisovan introgression in EE/NA populations is correlated with their**  
8 **genetic affinity with Oceanians.**

9 Genetic affinity is measured by  $f_4(\text{Yoruba}, \text{New Guinean}; \text{French}, X)$ . We  
10 observed a significant correlation between Denisovan ancestry and New Guinea  
11 ancestry with (A)  $R^2 = 0.23$  ( $p = 2.5 \times 10^{-3}$ ) for all EE/NA populations with  
12  $R_D(X) > 1$ , and (B)  $R^2 = 0.54$  ( $p = 3.8 \times 10^{-6}$ ) when we remove East Asians.  
13 Significant correlations were also observed when New Guinean was replaced by  
14 Australian with (C)  $R^2 = 0.19$  ( $p = 6.7 \times 10^{-3}$ ) and (D)  $R^2 = 0.48$  ( $p =$   
15  $2.0 \times 10^{-5}$ ) when we remove East Asians.

A

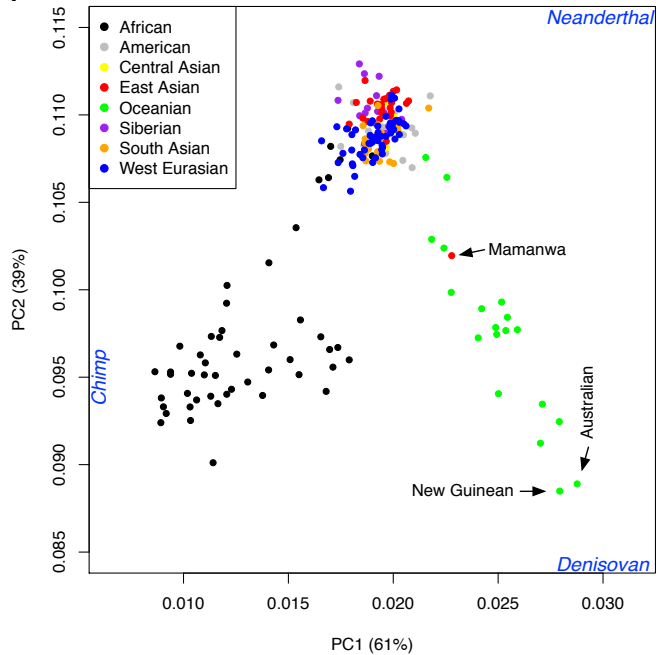

B

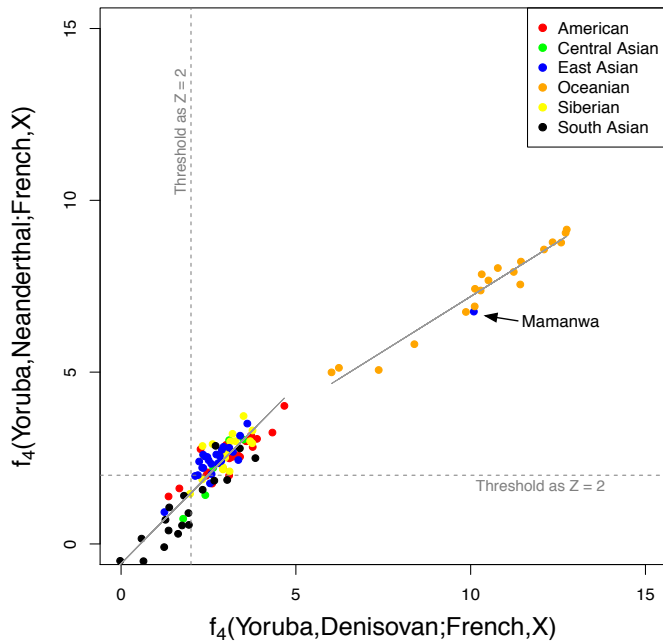

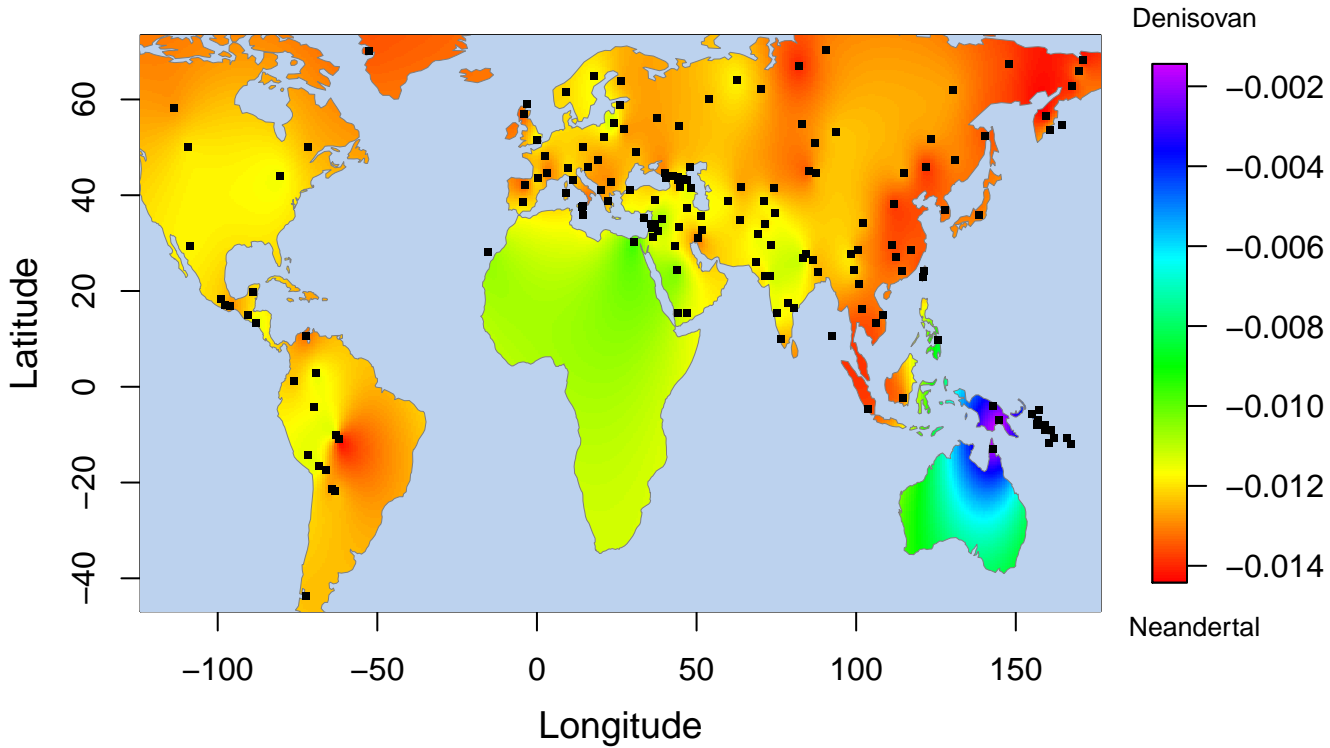

A

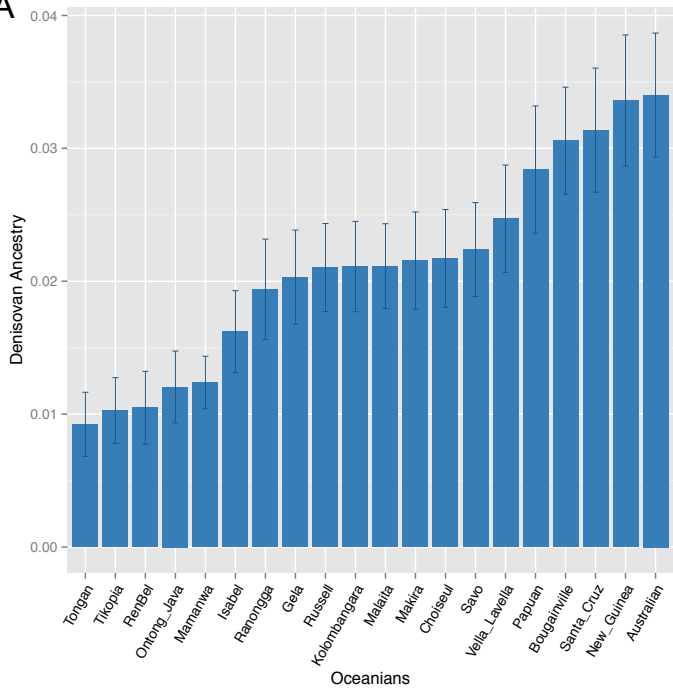

B

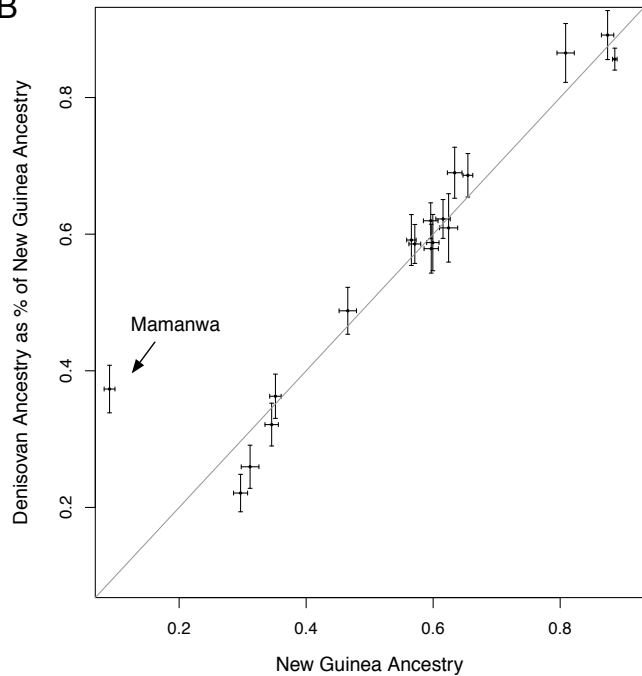

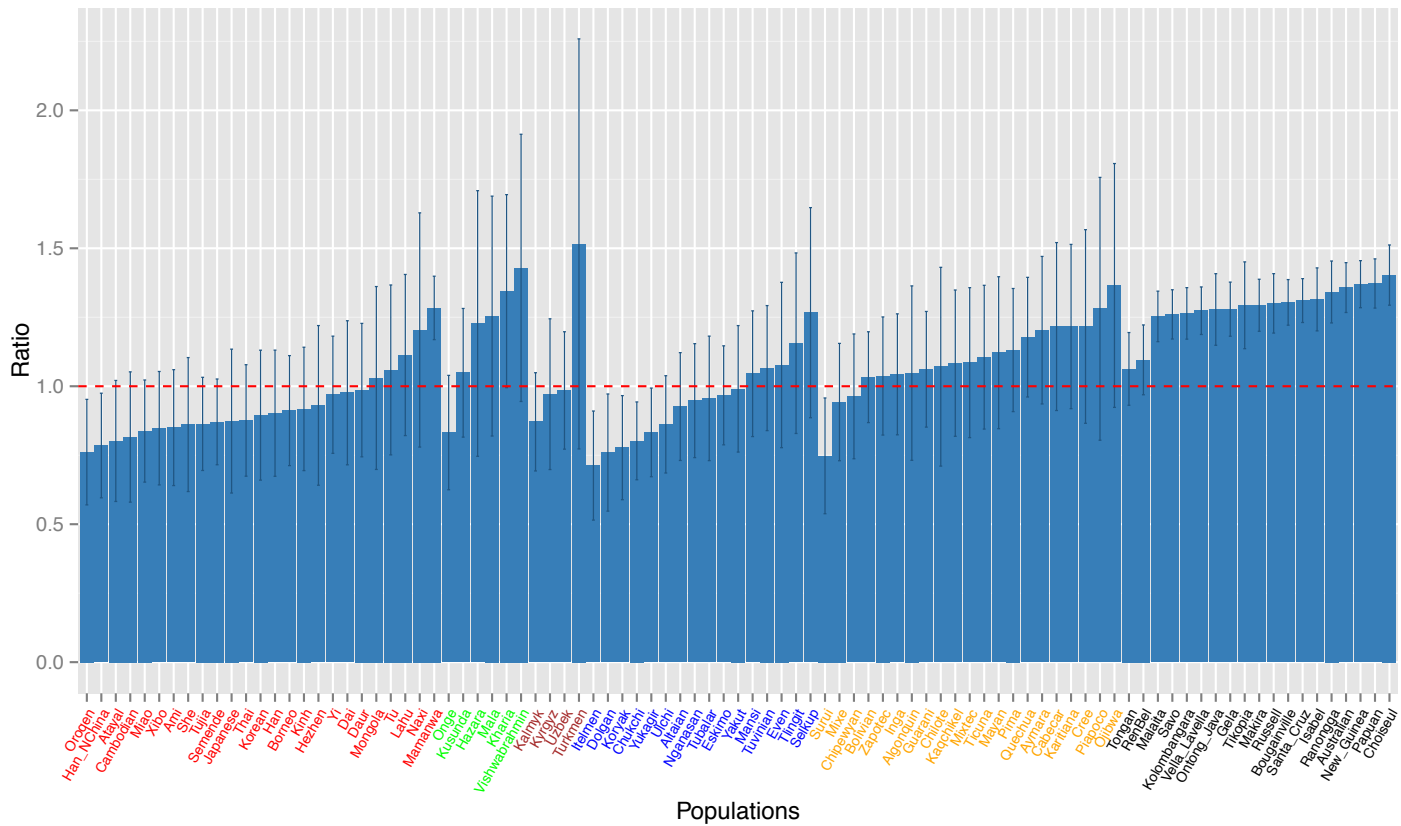

**A**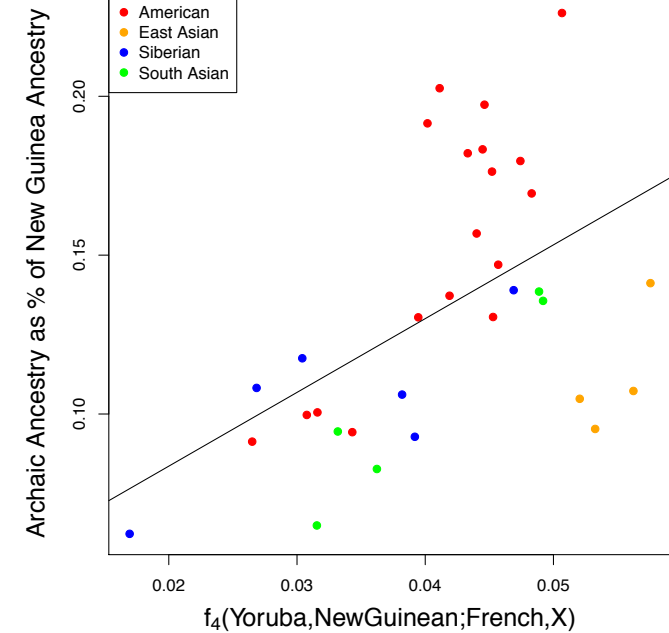**B**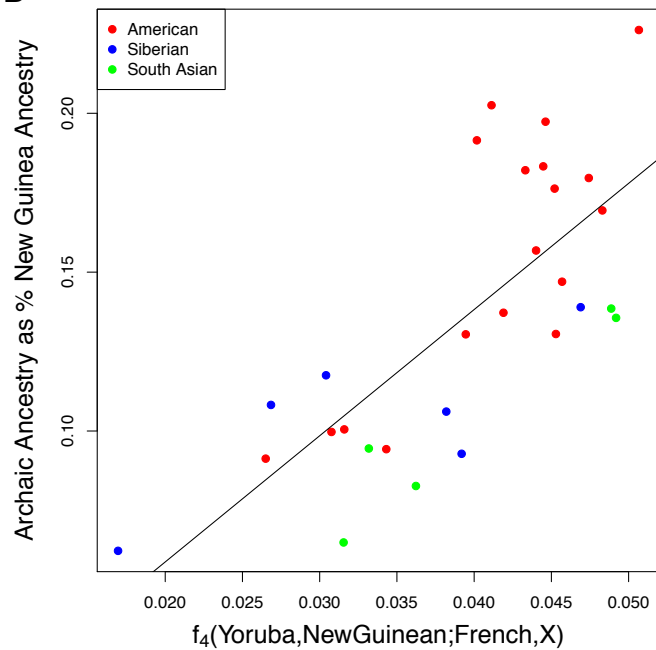**C**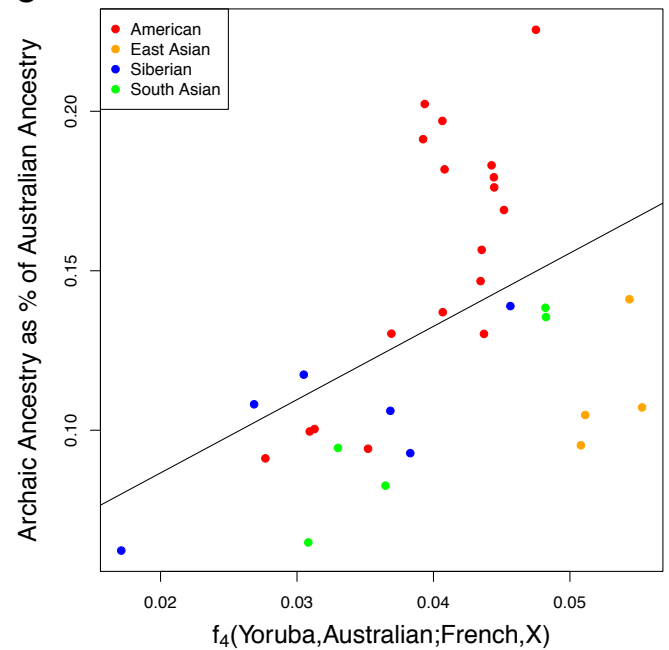**D**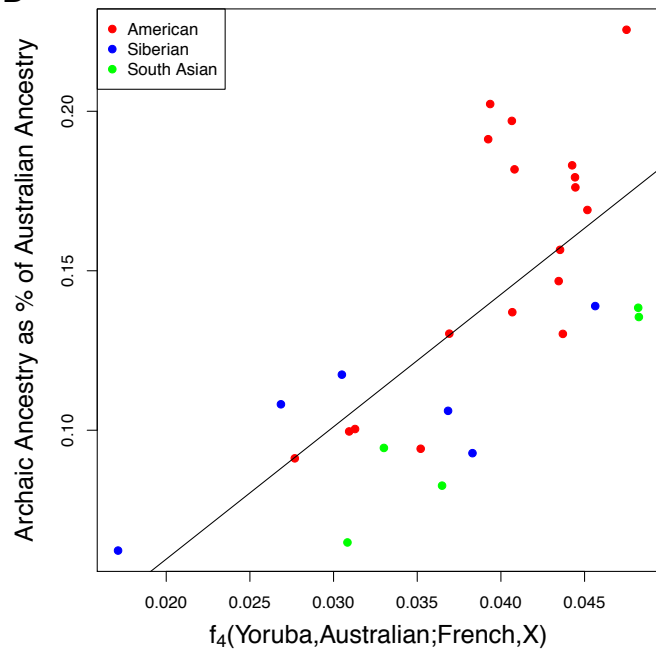

Source: http://www.biorxiv.org/content/biorxiv/early/2015/04/03/017475.full.pdf
